# Supplementary material for: Genetic screening identifies a SUMO protease dynamically maintaining centromeric chromatin
Source: PubMed Central journal article supplement (PMC6981222; doi:10.1038/s41467-019-14276-x), 2020-01-24

Fig. 4D

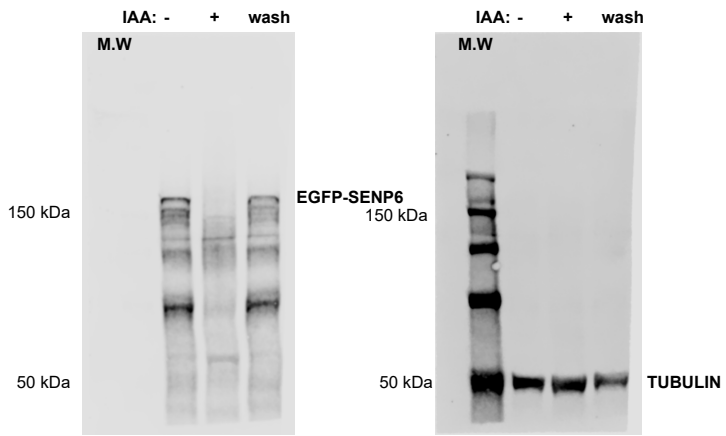

Fig. 5E (top)

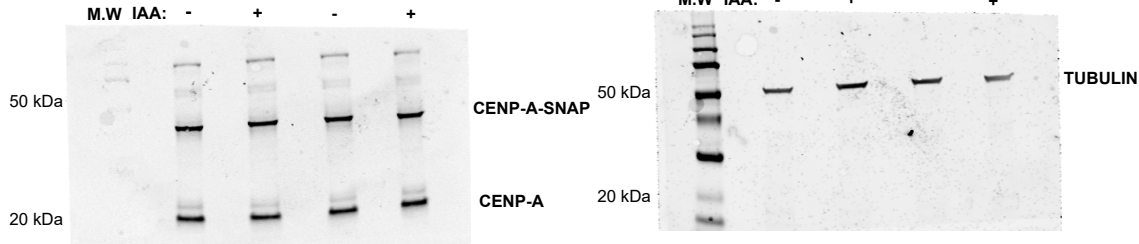

Fig. 5E (bottom)

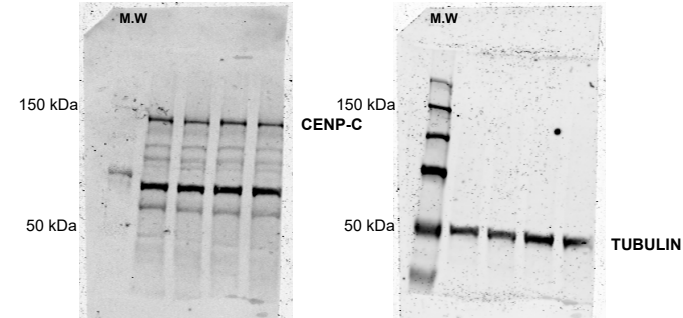

Fig. S2A

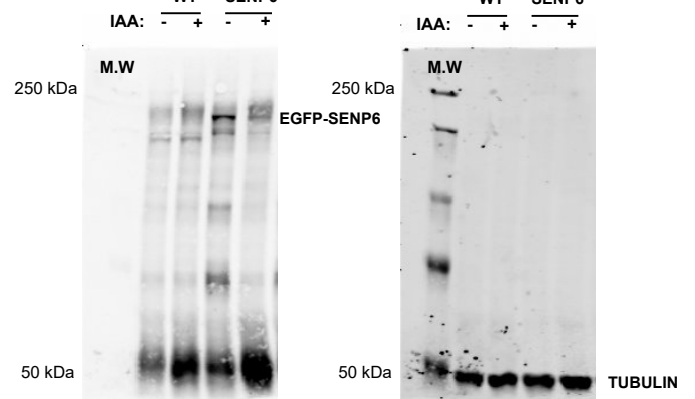

Fig. S4C (top)

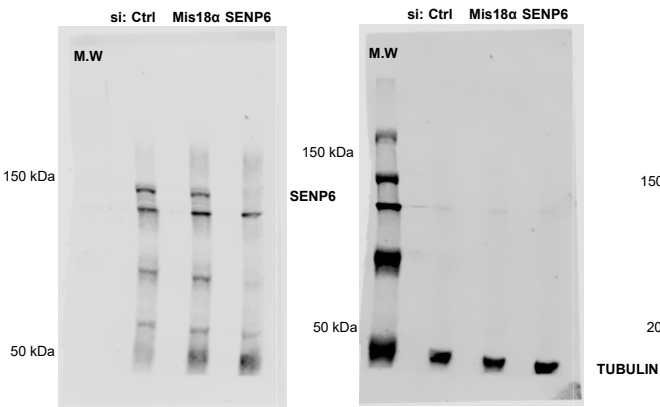

Fig. S4C (middle)

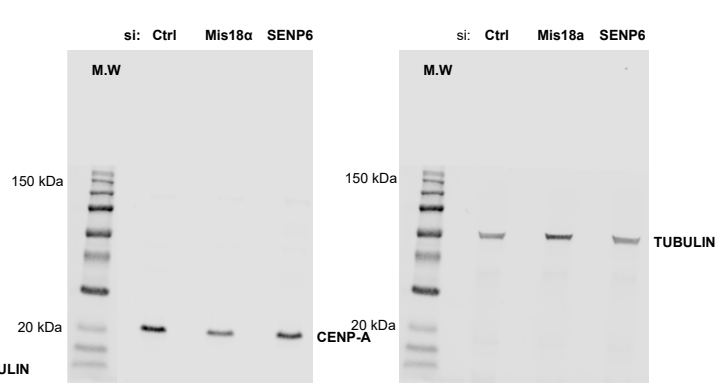

Fig. S4C (bottom)

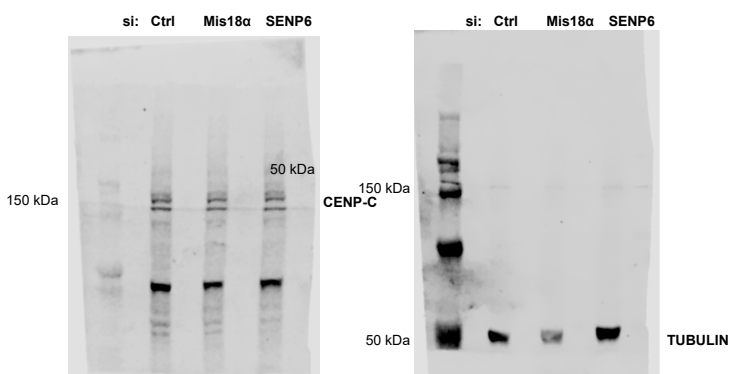

Fig. 6A(left)

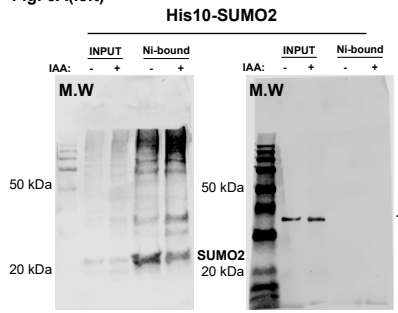

Fig. 6A(right)

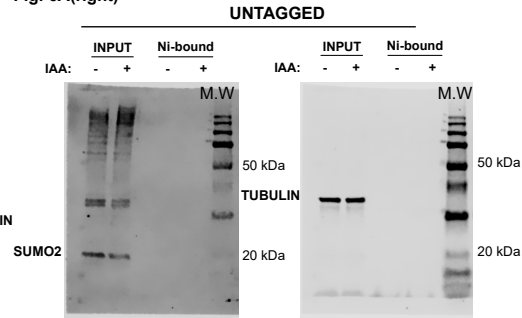

Fig. 6B(left)

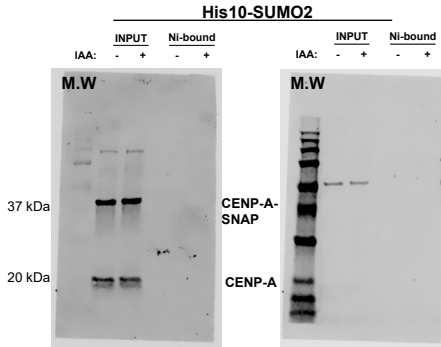

Fig. 6B(right)

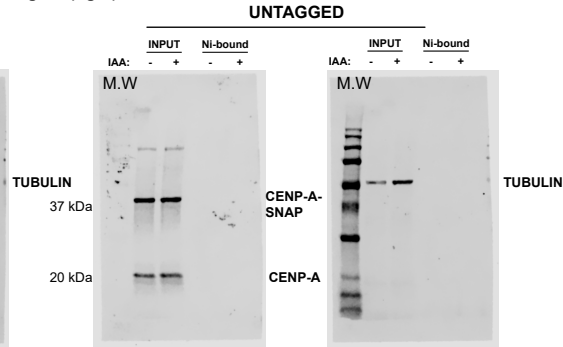

Fig. 6C(left)

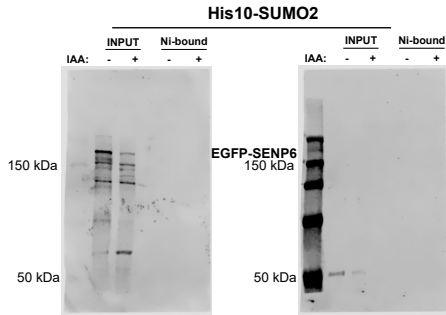

Fig. 6C(right)

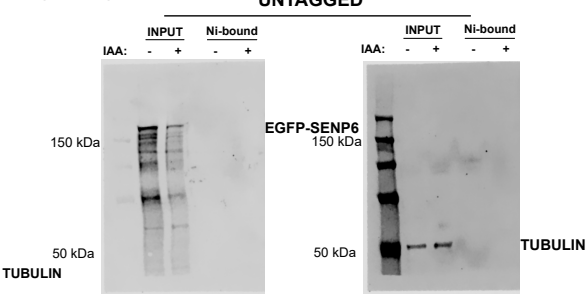

Fig. 6D(left)

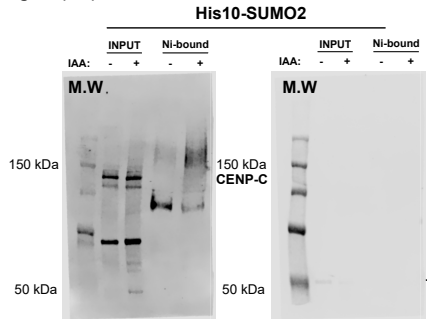

Fig. 6D(right)

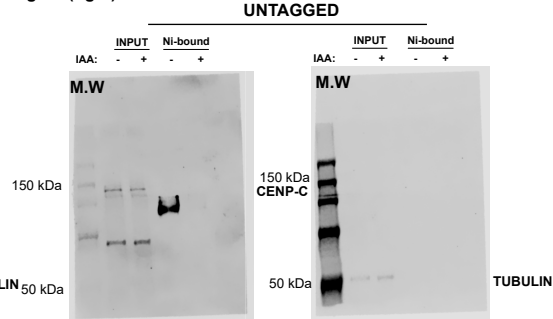

Fig. 6E(left)

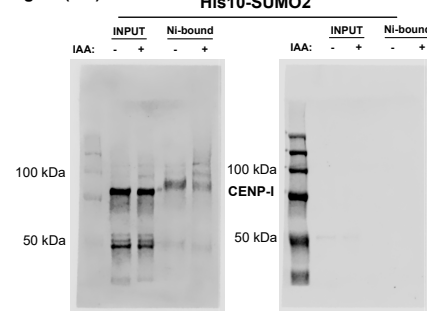

Fig. 6E(right)

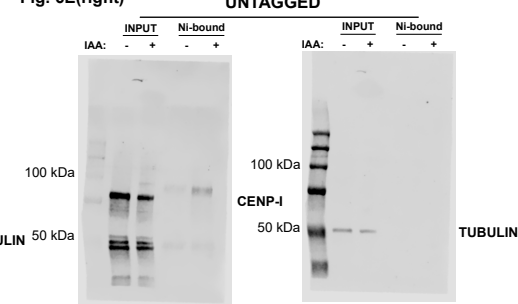

Fig. 6F(left)

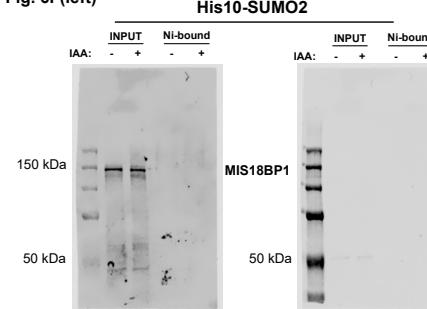

Fig. 6F(right)

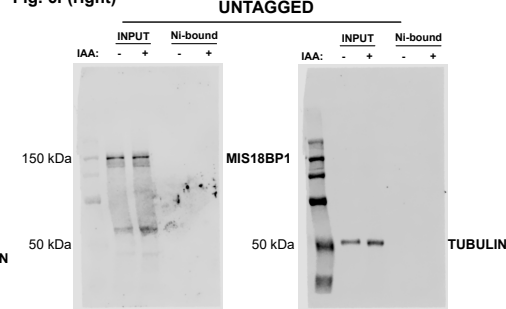

Supplement: 41467_2019_14276_MOESM9_ESM.pdf [file 41467_2019_14276_MOESM9_ESM.pdf]
